# Supplementary material
Source: publisher figshare collection journal article supplement (https://sage.figshare.com/ndownloader/files/21715506)
Supplement: Supplementary file 1 [file 21715506]

| Respondent PRRespondent Profile | Numberof Respondents | Interview Type Type |
| --- | --- | --- |
| City of Toronto Community Planner (from midtown) | 4 | semi-structured |
| City of Toronto Community Planner (from downtown) | 6 | semi-structured |
| City of Toronto Planner, Zoning | 2 | semi-structured |
| Private Property Developer (from both midtown and downtown) | 8 | semi-structured |
| City of Toronto Councillor Downtown | 5 | semi-structured |
| City of Toronto Councillor Midtown | 5 | semi-structured |
|  |  |  |
| Total Interviews | 30 |  |
|  |  |  |
